# Supplementary material
Source: PubMed Central journal article supplement (PMC9857813)
Supplement: jamainternmed-e226117-s002.pdf [file jamainternmed-e226117-s002.pdf]

## Data Sharing Statement

Shan. Healthy Eating Patterns and Risk of Total and Cause-Specific Mortality. *JAMA Intern Med.* Published January 09, 2023. doi:10.1001/jamainternmed.2022.6117

### Data

**Data available:** No
